# Supplementary material
Source: PubMed Central journal article supplement (PMC4140407)
Supplement: NIHMS614723-supplement-3.pdf [file NIHMS614723-supplement-3.pdf]

**Table S1.** Conjunction analysis using the contrast [sponsor > nonsponsor] for both the MT and the ACT group in the pre-training condition.

| <b>Region</b>                     | <b>Voxels</b> | <b>t-value</b> | <b>MNI (x y z)</b> |
|-----------------------------------|---------------|----------------|--------------------|
| Left vmPFC                        | 74            | 3.20           | -2 50 -6           |
| Right anterior cingulate(ACC)     | 138           | 3.04           | 2 32 21            |
| Left middle frontal gyrus         | 43            | 3.13           | -42 20 28          |
| Right posterior cingulate (BA 23) | 219           | 3.11           | 4 -32 38           |
| Right precuneus                   | 99            | 3.04           | 2 -52 38           |
| Right superior temporal gyrus     | 115           | 3.27           | 68 -24 2           |

Activations are displayed at  $P < 0.001^2$ , uncorrected. Extent threshold > 10 voxels.
